# Supplementary material for: Mathematical modeling for bioprocess optimization of a protein drug, uricase, production by Aspergillus welwitschiae strain 1–4
Source: PubMed Central journal article supplement (PMC6736946; doi:10.1038/s41598-019-49201-1), 2019-09-10

**Original Article**

**Mathematical modeling for bioprocess optimization of a protein drug, uricase, production by *Aspergillus welwitschiae* strain 1-4**

**<sup>1</sup>Noura El-Ahmady El-Naggar, <sup>2</sup>S.A. Haroun, <sup>2</sup> Eman M. El-Wesly, <sup>2</sup> E.A. Metwally, and <sup>2</sup>A.A. Sherief**

<sup>1</sup> Department of Bioprocess Development, Genetic Engineering and Biotechnology Research Institute, City of Scientific Research and Technological Applications, Alexandria 21934, Egypt

<sup>2</sup> Department of Botany, Faculty of Science, Mansoura University, Egypt

**Correspondence should be addressed to:**

**Prof. Noura El-Ahmady Ali El-Naggar**

**Address:**

Bioprocess Development Department,  
Genetic Engineering and Biotechnology Research Institute,  
City of Scientific Research and Technological Applications,  
New Borg El- Arab City, 21934, Alexandria, Egypt

**Tel:** (002)01003738444

**Fax:** (002)03 4593423

**E-mail:** nouraelahmady@yahoo.com

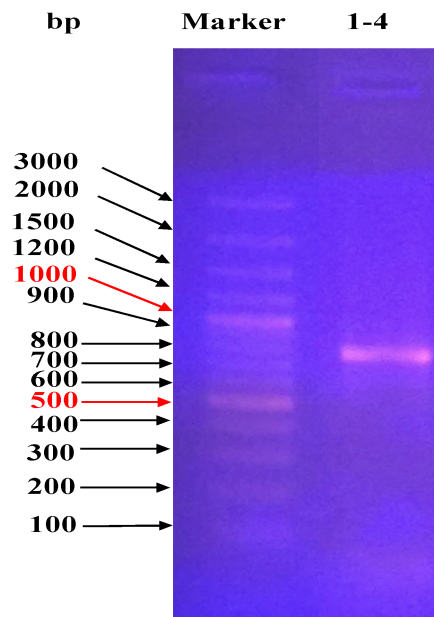

**Supplementary Figure S1.** Agarose gel electrophoresis shows the PCR product of the amplified *Aspergillus welwitschiae* 18S rRNA fragment.

**Complete gel for Figure S1**

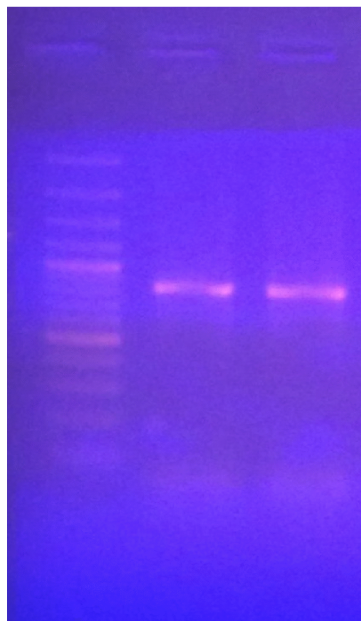

Supplement: 41598_2019_49201_MOESM1_ESM.pdf [file 41598_2019_49201_MOESM1_ESM.pdf]
